# Supplementary material for: Growth and development of Arabidopsis thaliana under single-wavelength red and blue laser light
Source: PubMed Central journal article supplement (PMC5034235; doi:10.1038/srep33885), 2016-09-23

1 **Supplementary Information**

2

3 **Growth and development of *Arabidopsis thaliana* under single-wavelength red**  
4 **and blue laser light**

5

6 **Authors**

7 Amanda Ooi<sup>1\*</sup>, Aloysius Wong<sup>1\*</sup>, Tien Khee Ng<sup>2</sup>, Claudius Maronedze<sup>3</sup>, Christoph  
8 Gehring<sup>1</sup> & Boon Ooi<sup>2†</sup>

9

10 **Affiliations**

11 <sup>1</sup> Division of Biological and Environmental Sciences and Engineering, 4700 King  
12 Abdullah University of Science and Technology, Thuwal 23955-6900, Kingdom of Saudi  
13 Arabia.

14 <sup>2</sup> Division of Computer, Electrical, and Mathematical Sciences and Engineering, 4700  
15 King Abdullah University of Science and Technology, Thuwal 23955-6900, Kingdom of  
16 Saudi Arabia.

17 <sup>3</sup> Department of Biochemistry, Cambridge Centre for Proteomics, University of  
18 Cambridge, Cambridge, United Kingdom.

19

20 †To whom correspondence should be addressed: boon.ooi@kaust.edu.sa

21 \* These authors contributed equally to this work.

22

23 **Supplementary Figure S1**

24 **Seedling emergence of *Arabidopsis thaliana* under different regime of LEDs for**  
25 **optimization of spectral composition.**

26 (a) Physical measurements of (i) hypocotyl length and (ii) percentage of seed  
27 germination and (b) biochemical analysis of (i) total chlorophyll and (ii) total carotenoid  
28 level of 5-days old Col-0 seedlings to determine the optimal spectral composition, i.e.  
29 ratio and light components, for the growth and development of *Arabidopsis thaliana*.  
30 Sterile Col-0 seeds were stratified at 4°C in the dark prior sowing to half-strength  
31 Murashige and Skoog (MS) agar medium (with sucrose, pH 5.7). Plants were  
32 germinated and grown under different LED light compositions and intensities for a  
33 period of five days in a continuous light regime or for 16/8 hour photoperiod at 22°C with  
34 a relative humidity of 50-60 %. Hypocotyl length was measured using imageJ software.  
35 Error bars represent standard error of the mean calculated from  $n > 18$ , where  $n$   
36 represents independent biological replicates. (c) 5-days old *Arabidopsis* seedlings  
37 grown under cool-white fluorescent (W) and red and blue (RB) LED light regime (9:1  
38 ratio of red (670 nm peak) and blue (470 nm peak)) respectively at an average photon  
39 flux density of  $22 \mu\text{mol m}^{-2} \text{s}^{-1}$  for 16/8-hour photoperiod.

40

41 **Supplementary Figure S2**

42 **Phenotypic and biochemical characterisation of plants grown under a 9:1 ratio of**  
43 **red and blue LED light.**

44 (a) Phenotypic observation of (i) 14-days old and (ii) 21-days old *Arabidopsis* plants  
45 grown under the LED light regime (9:1 ratio of red (670 nm peak) and blue (470 nm  
46 peak) LED (RB) light) at an average photon flux density of  $75 \mu\text{mol m}^{-2} \text{s}^{-1}$  for 16/8-hour  
47 photoperiod at 22 °C with a relative humidity of 50–60 %. RB LED-grown plants  
48 displayed distinct phenotype, i.e. elongated petiole length, broader and expanded leaf  
49 blade as compared to the control plants that were grown under white fluorescent (W)  
50 light. (b) Measurement of (i) fresh and (ii) dry weight and (c) biochemical analysis of (i)  
51 total chlorophyll and (ii) carotenoid level of 22-days old RB LED-grown plants. Error  
52 bars represent standard error of the mean calculated from 10 independent biological  
53 replicates.

54

### 55 **Supplementary Figure S3**

#### 56 **Spectral composition and chromaticity diagram of cool-white fluorescent and red** 57 **and blue laser light.**

58 The spectral composition of (a) the cool-white fluorescent (W), and (b) red and blue  
59 DPSS lasers (RB) used in this study. Irradiance spectra of each respective light source  
60 were measured *in situ* using a GL SPECTICS 5.0 Touch spectrometer (JUST Normlicht  
61 GmbH, Weilheim an der Teck, Germany) within the waveband range from 340 to 850  
62 nm. The graphs were plotted using a OriginPro 8.5.1 SR2 software (OriginLab  
63 Corporation, Northampton, MA). The corresponding chromaticity diagrams for (W) and  
64 (RB) light are shown in (c), and (d), respectively. The (W) light has CIE (*Commission*  
65 *Internationale de l'Eclairage*) 1931 color coordinates (black cross), correlated color

66 temperature, and color rendering index of (0.39,0.38), 3879, and 82.4 respectively.  
67 These values are used to quantify human perception of light quality. As for the (RB)  
68 light, the dosage is more important than the perceived color of light to confirm the  
69 narrow spectrum of the laser characteristic, as indicated by the color coordinates (0.50,  
70 0.47).

71

## 72 **Supplementary Figure S4**

### 73 **Seedling emergence and root development of plants grown under red and blue** 74 **laser and LEDs.**

75 (a) 14-days old *Arabidopsis* plants that were germinated and grown on half-strength MS  
76 agar medium (without sucrose, pH 5.7) under (i) cool-white fluorescent, (ii) red and blue  
77 (RB) laser light regime (9:1 ratio of red (671 nm) and blue (473 nm) lasers) and (iii) red  
78 and blue (RB) LED light regime (9:1 ratio of red (670 nm peak) and blue (470 nm peak))  
79 at an average photon flux density of 80–90  $\mu\text{mol m}^{-2} \text{s}^{-1}$  for 16/8-hour photoperiod at 22  
80 °C with a relative humidity of 50–60 %. (b) Root development of 14-days old  
81 *Arabidopsis* plants under different light regime. Root length was measured using a 15  
82 cm ruler. Error bars represent standard error of the mean calculated from three  
83 independent experiments ( $n = 30$ ) where  $n$  represents independent biological replicates  
84 for each experiment.

85

## 86 **Supplementary Figure S5**

### 87 **Growth and development of laser-treated F1 offspring.**

88 (a) 7-days old and (b) 14-days old laser-treated *Arabidopsis* F1 offspring that were  
89 germinated and grown on half-strength MS agar medium (with sucrose, pH 5.7) under  
90 the red and blue (RB) laser light regime (9:1 ratio of red (671 nm) and blue (473 nm)  
91 lasers) at an average photon flux density of 90–100  $\mu\text{mol m}^{-2} \text{s}^{-1}$  for 16/8-hour  
92 photoperiod at 22 °C with a relative humidity of 50–60 %. (c) 21-days old and (d) 35-  
93 days old of laser-treated F1 offspring transferred from (b) to soil-based growth, in which  
94 these plants were further subjected to growth under cool-white fluorescent (W) light at  
95 similar light intensity and growth condition upon transfer from the (RB) laser light  
96 regime.  
97

98 **Supplementary Figure S1**

99 **Seedling emergence of *Arabidopsis thaliana* under different regime of LEDs for**  
 100 **optimization of spectral composition.**

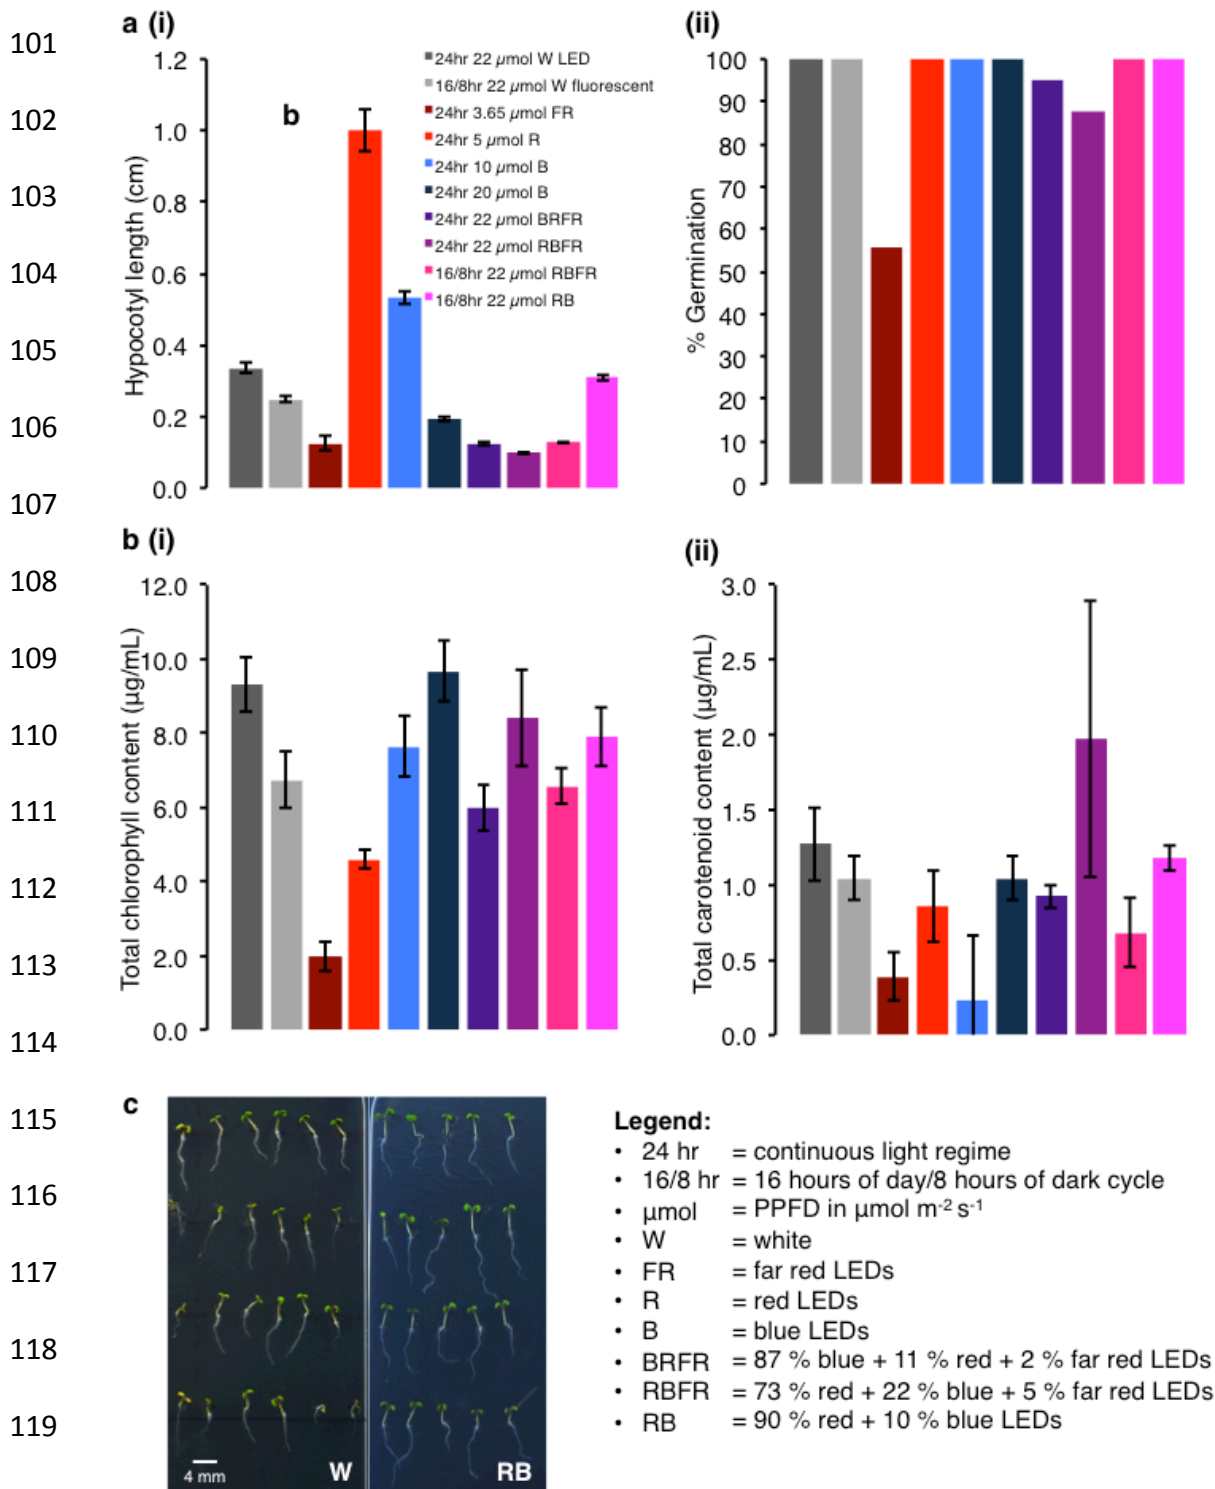

120 **Supplementary Figure S2**

121 **Phenotypic and biochemical characterisation of plants grown under a 9:1 ratio of**  
122 **red and blue LED light.**

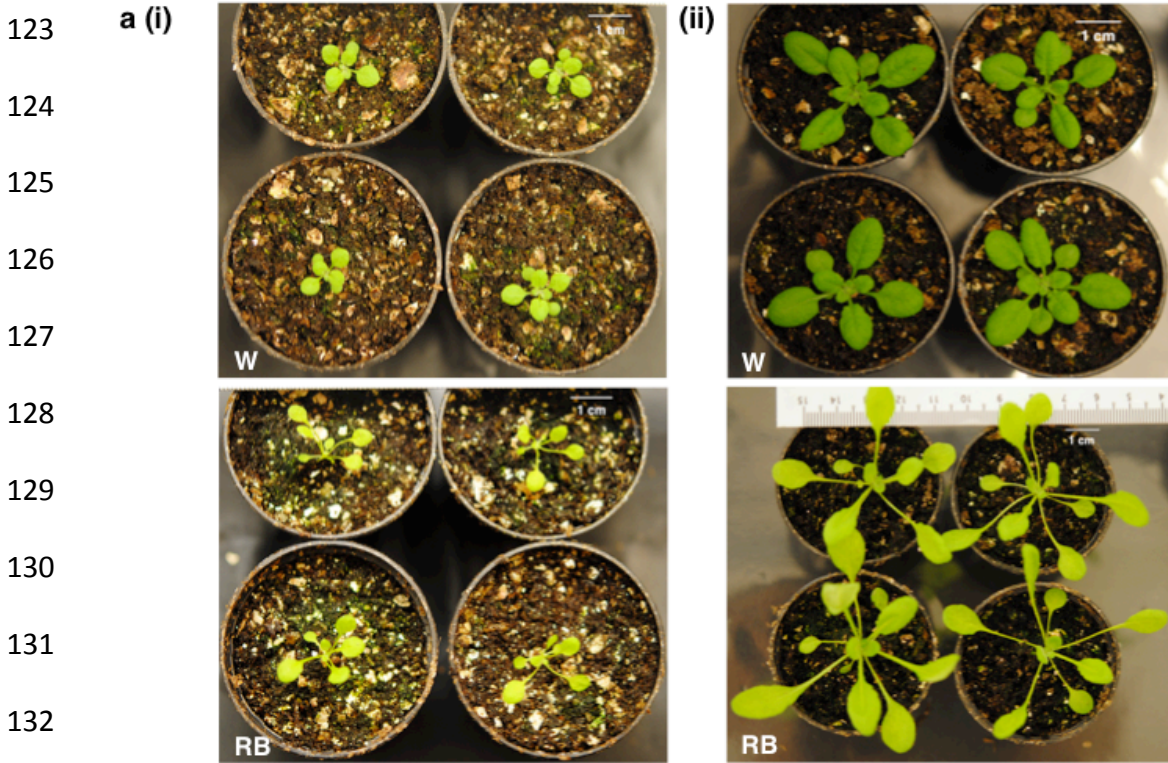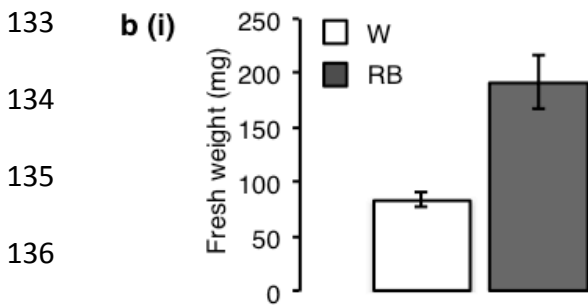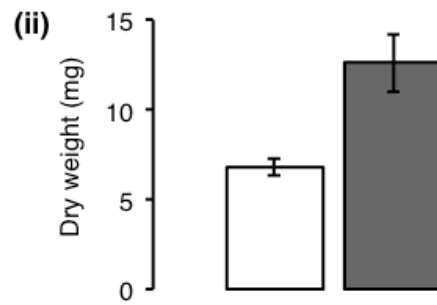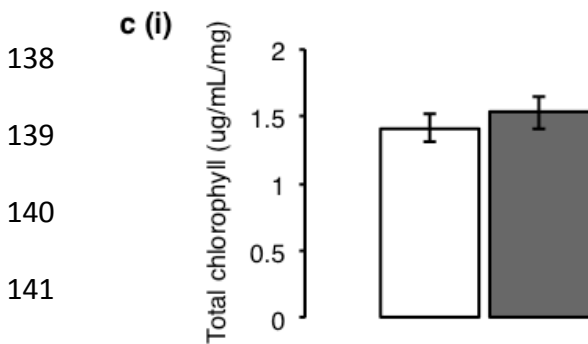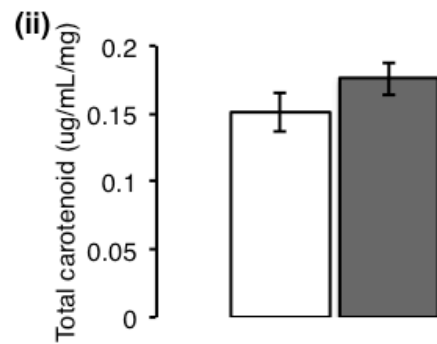

140

141

142 **Supplementary Figure S3**

143 **Spectral composition and chromaticity diagram of cool-white fluorescent and red**  
144 **and blue laser light.**

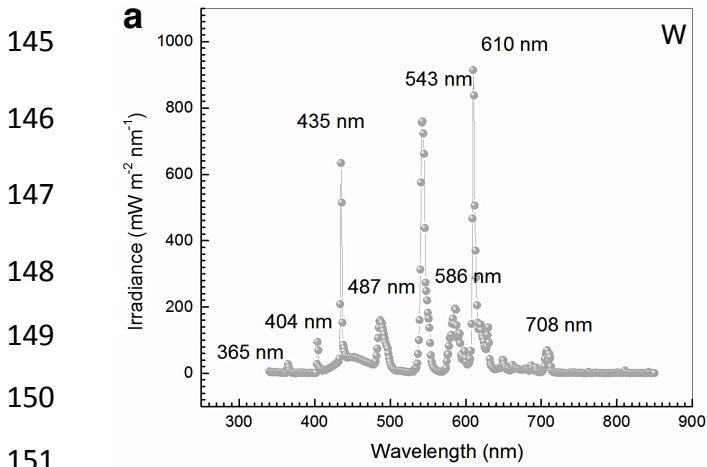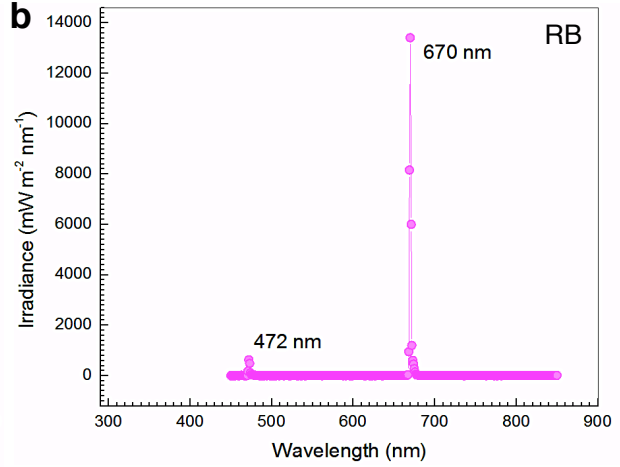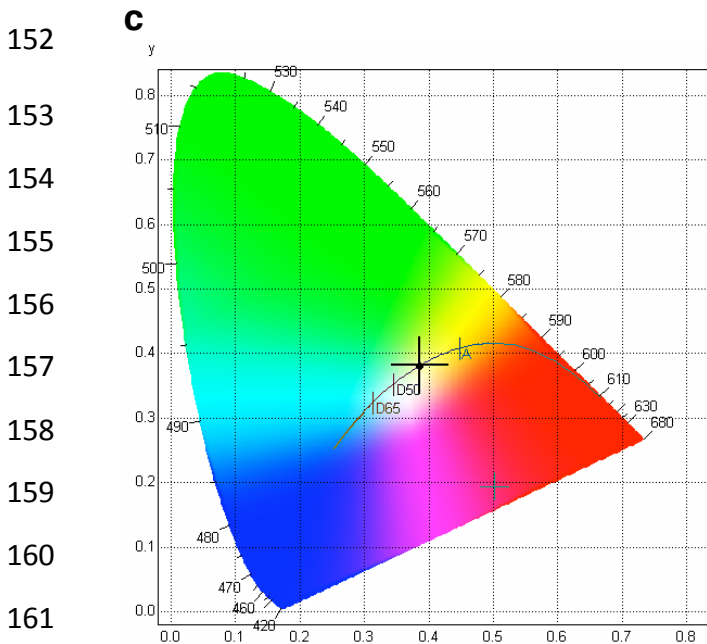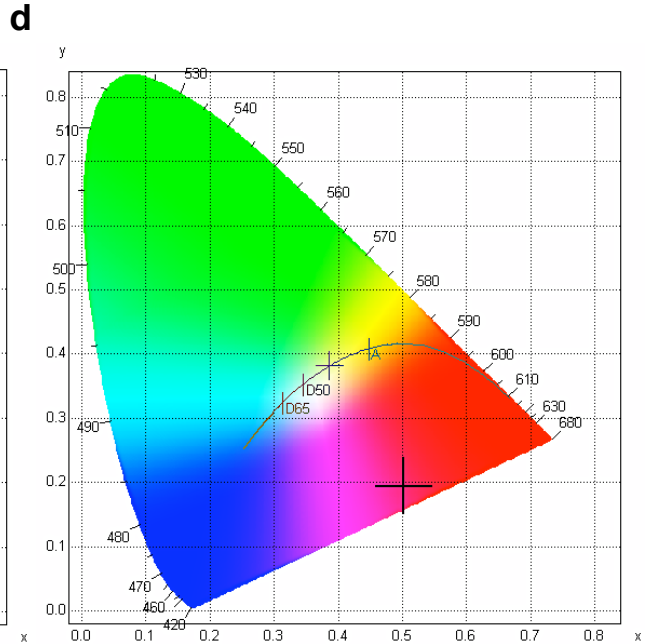

162



163 **Supplementary Figure S4**

164 **Seedling emergence and root development of plants grown under red and blue**  
165 **laser and LEDs.**

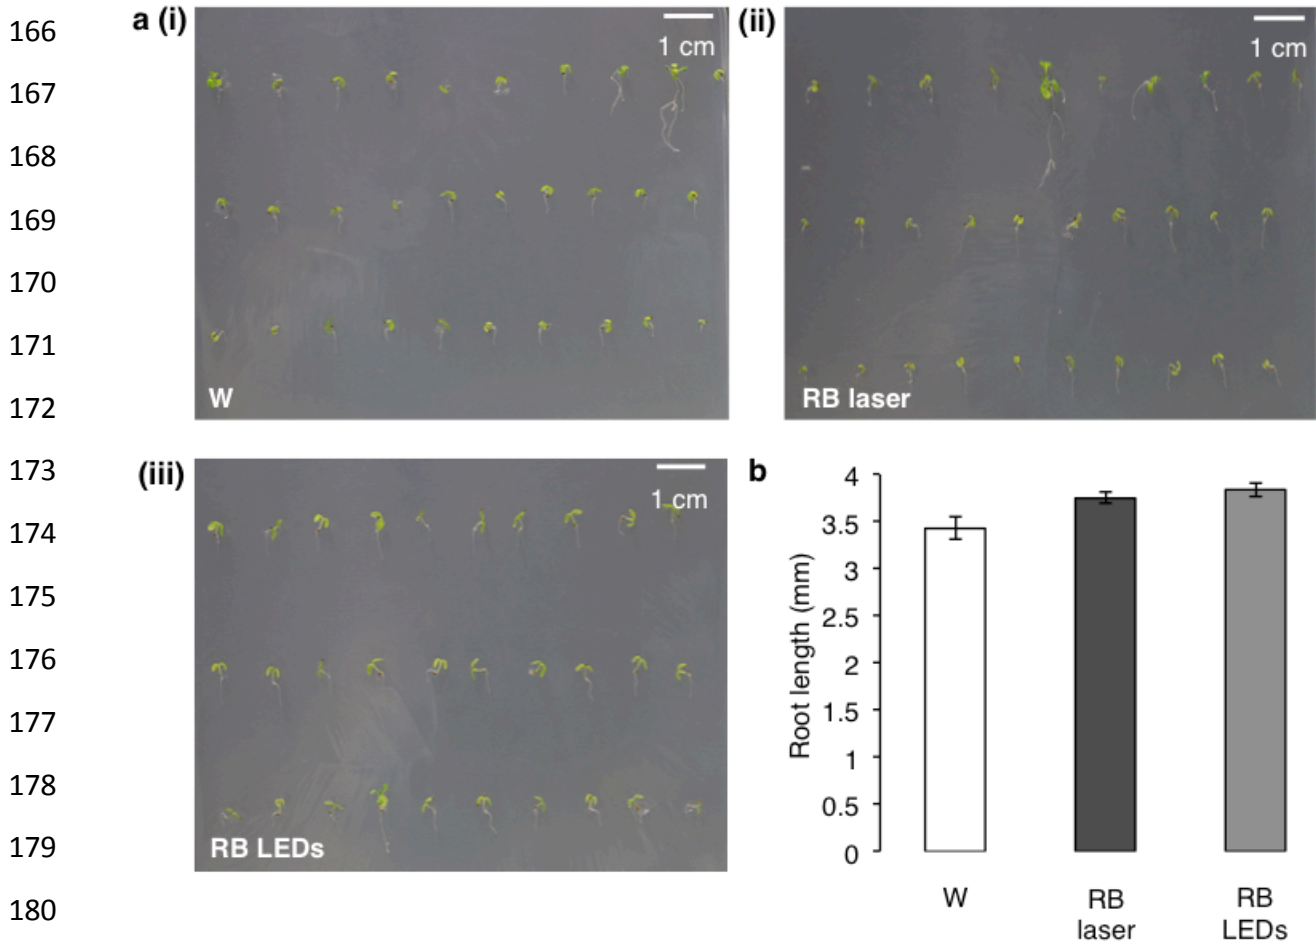

182 **Supplementary Figure S5**

183 **Growth and development of laser-treated F1 offspring.**

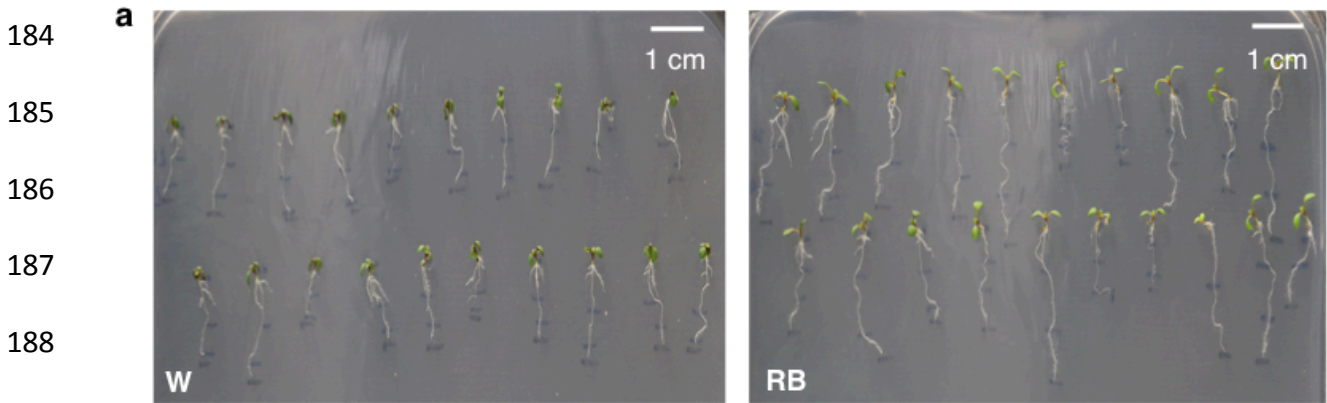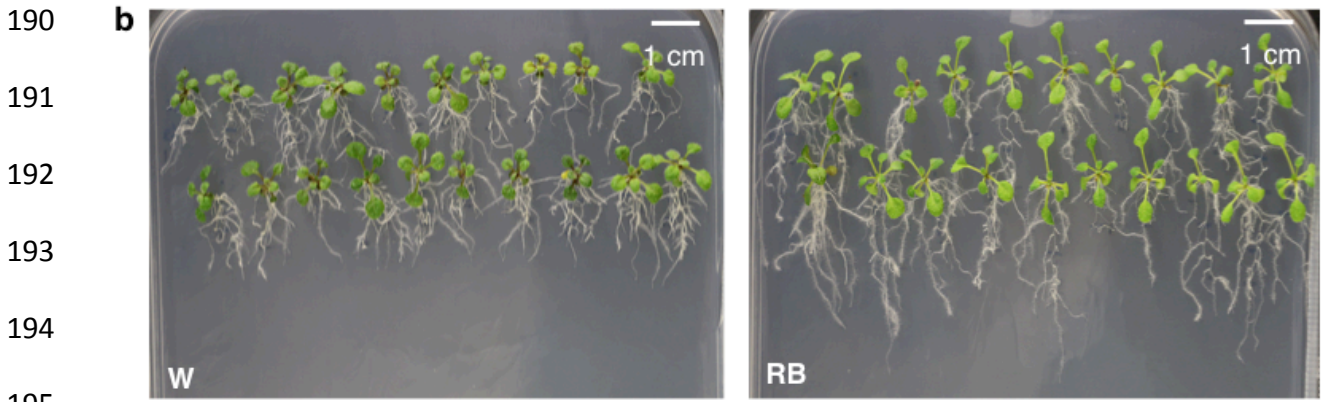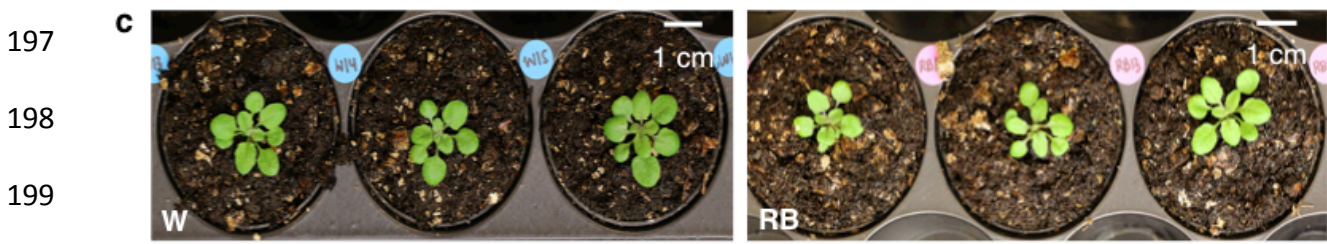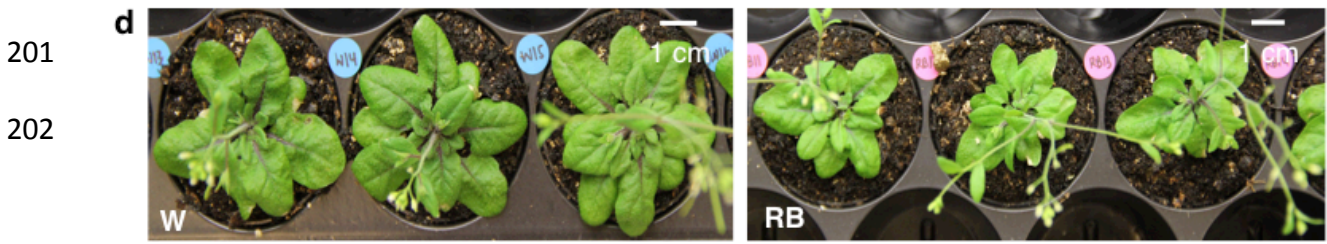

Supplement: srep33885-s1.pdf [file srep33885-s1.pdf]
